# Supplementary material
Source: Springer Nature journal article supplement (https://www.springermedizin.de/resource/supplementary/12889_2011_4519_MOESM3_ESM.pdf/9492472)
Supplement: MOESM3 [file 9492472]

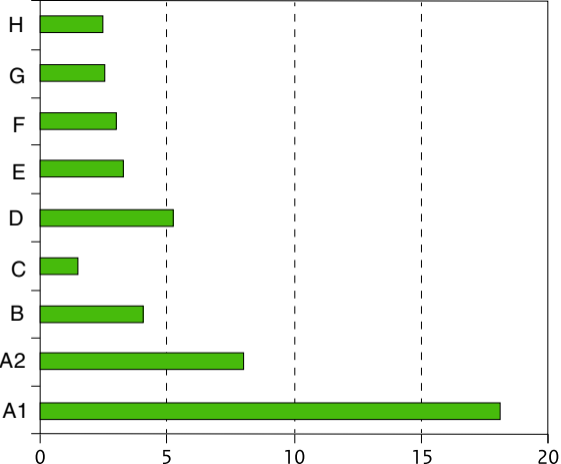

- H** = For the past 3 months, persistent report of 5 symptoms on a weekly basis and 5 on a monthly basis (symptoms chosen from a list) [79]
- G** = Report of 'much annoyance' attributed to EMF the past 2 weeks [7]
- F** = Report of disturbance/adverse health effects attributed to EMF & looking for medical help due to symptom severity [9]
- E** = Report of being allergic or very sensitive when being near electrical devices, computers and/or powerlines [8]
- D** = Report of adverse health effects attributed to EMF at the present time or anytime in the past [10]
- C** = Self-reported hypersensitivity to EMF [6]
- B** = Self-reported sensitivity to EMF [53]
- A2** = Self-reported electrohypersensitivity [86]
- A1** = Report of adverse health effects distributed to EMF [86]
